# Supplementary material
Source: PubMed Central journal article supplement (PMC6613582)
Supplement: NIHMS1033597-supplement-1.pdf [file NIHMS1033597-supplement-1.pdf]

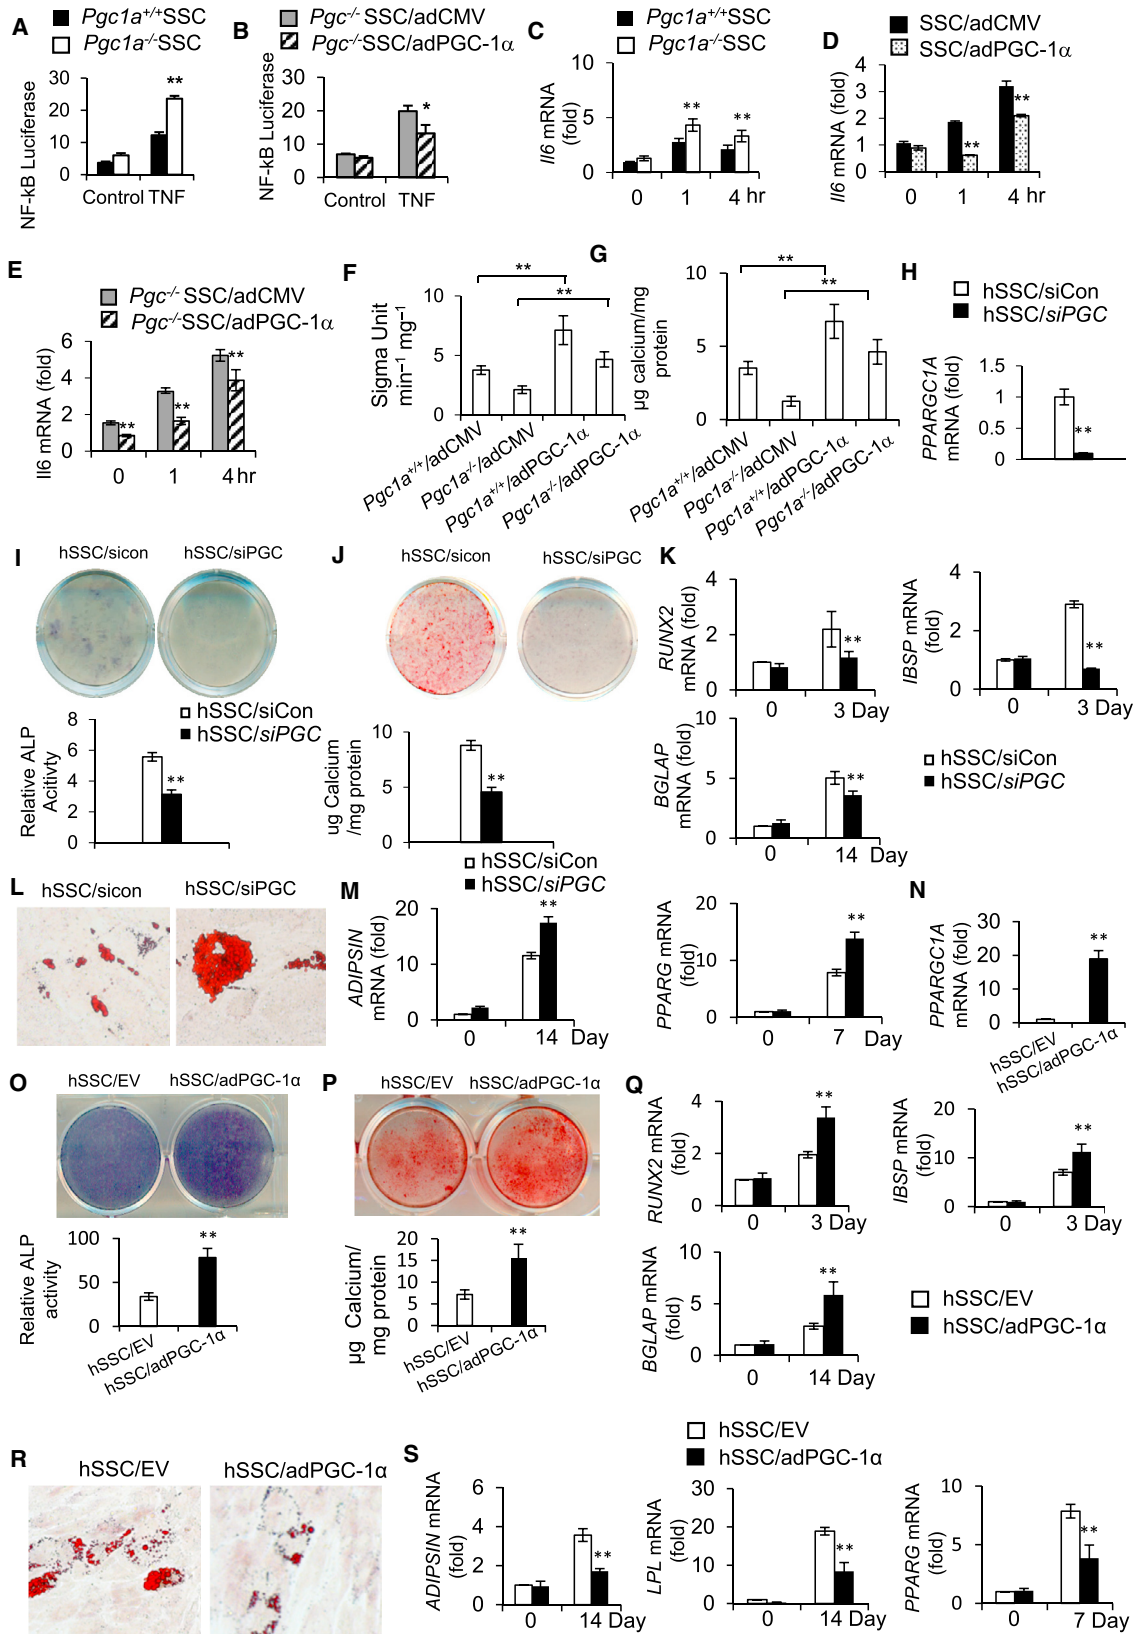

**Figure S4. PGC-1α Regulates NF-κB Activation in SSCs and Controls Osteoblastic and Adipogenic Differentiation of Human SSCs In Vitro, Related to Figure 4 (corrected)**

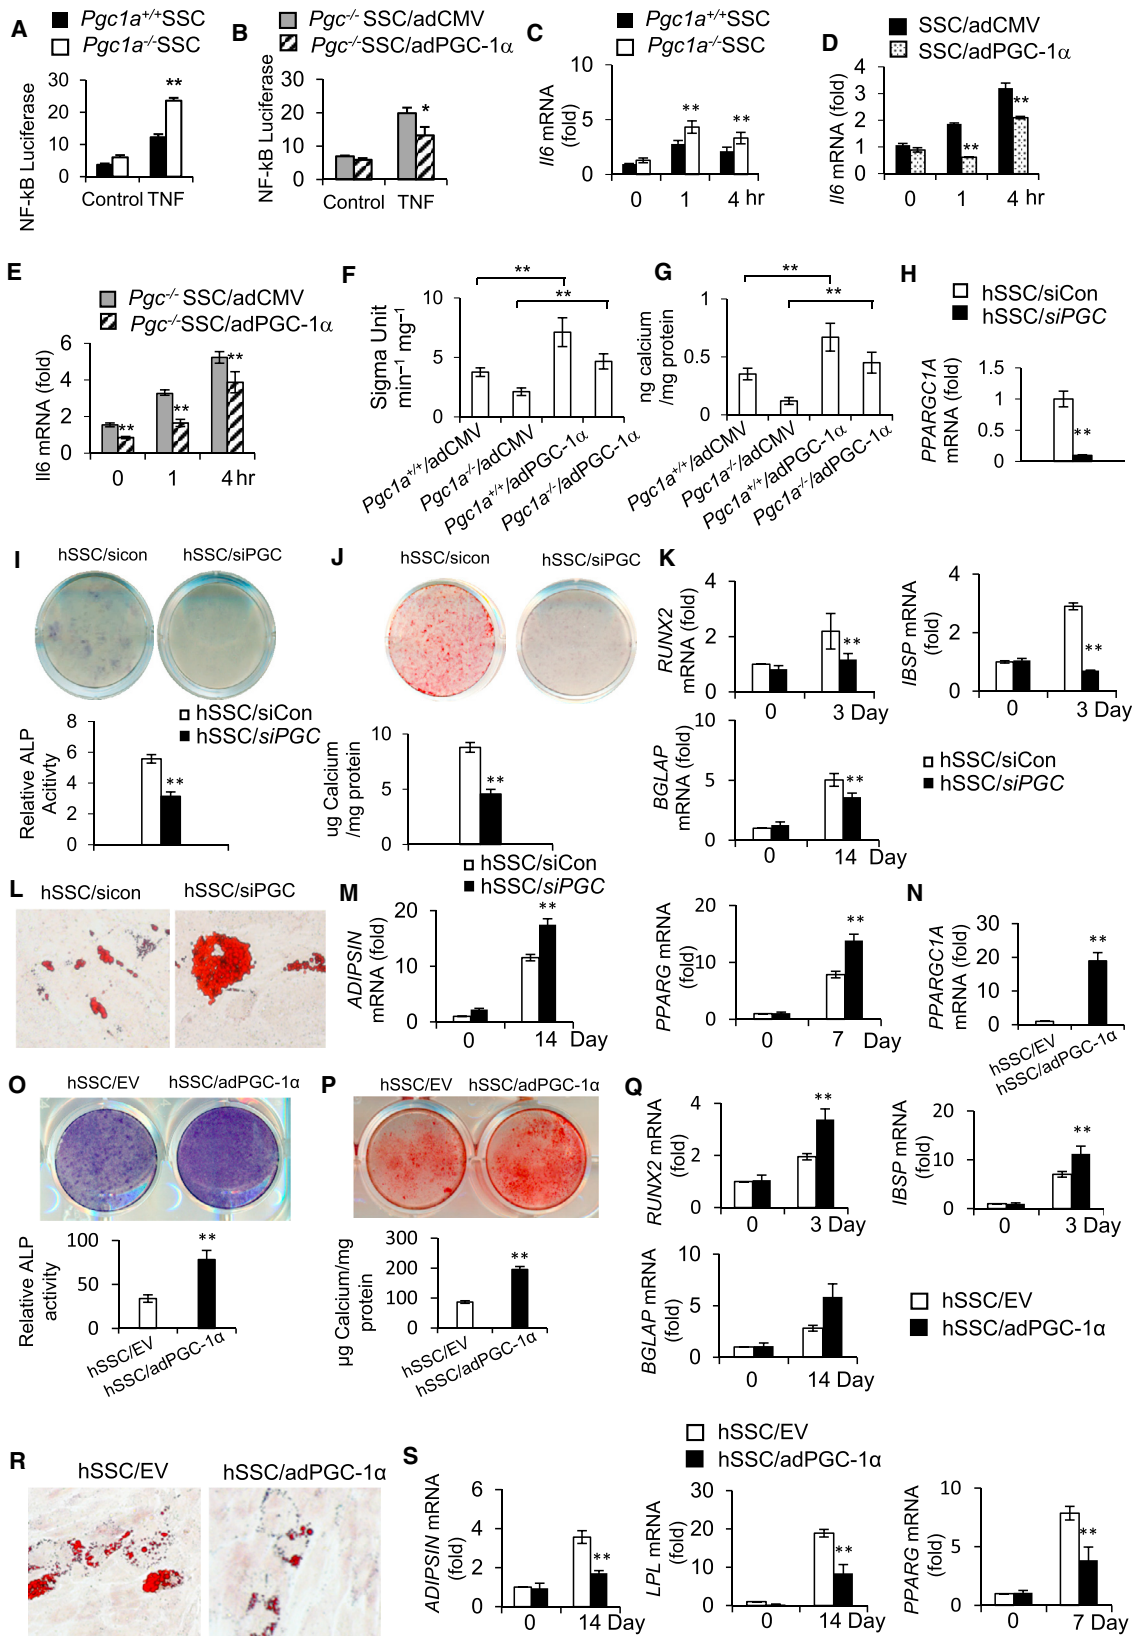

Figure S4. PGC-1α Regulates NF-κB Activation in SSCs and Controls Osteoblastic and Adipogenic Differentiation of Human SSCs *In Vitro*, Related to Figure 4 (original)

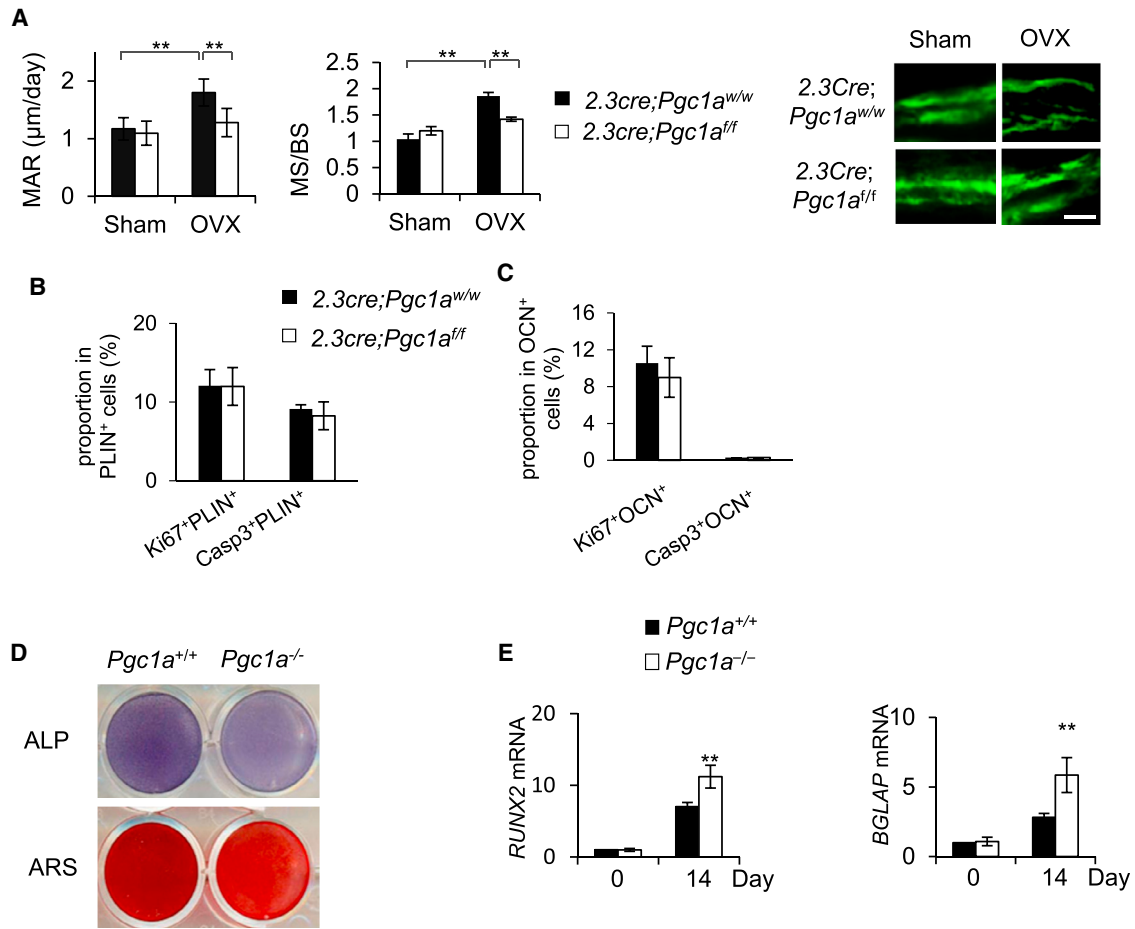

Figure S5. Conditional Deletion of PGC-1 $\alpha$  in Osteoblasts Only Impaired Bone Formation but Did Not Affect MAT Accumulation after OVX, Related to Figure 5 (corrected)

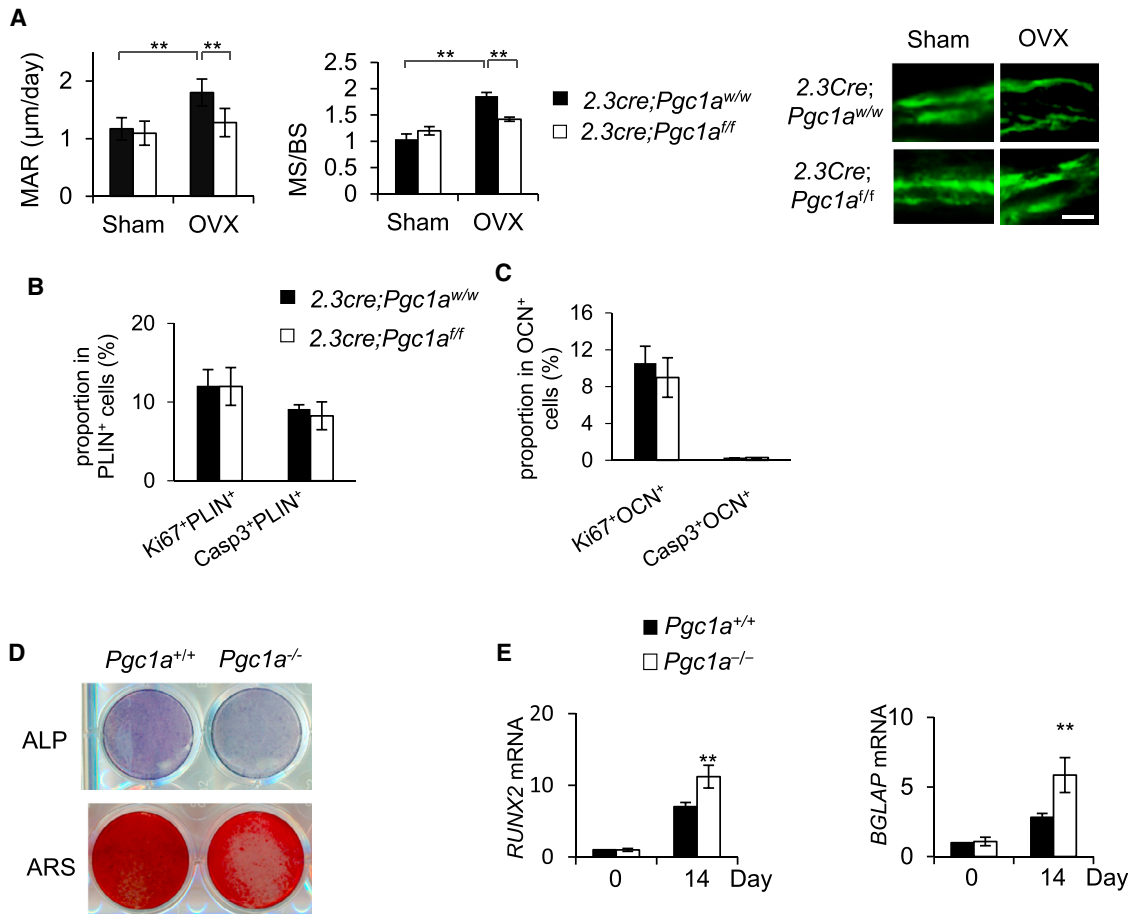

Figure S5. Conditional Deletion of PGC-1 $\alpha$  in Osteoblasts Only Impaired Bone Formation but Did Not Affect MAT Accumulation after OVX, Related to Related to Figure 5 (original)
